# Supplementary material for: The binding interactions that maintain excitation–contraction coupling junctions in skeletal muscle
Source: PubMed Central journal article supplement (PMC6445584; doi:10.1085/jgp.201812268), 2019-02-06
Supplement: JGP_201812268_sm.pdf [file JGP_201812268_sm.pdf]

## Supplemental material

Ríos et al., <https://doi.org/10.1085/jgp.201812268>

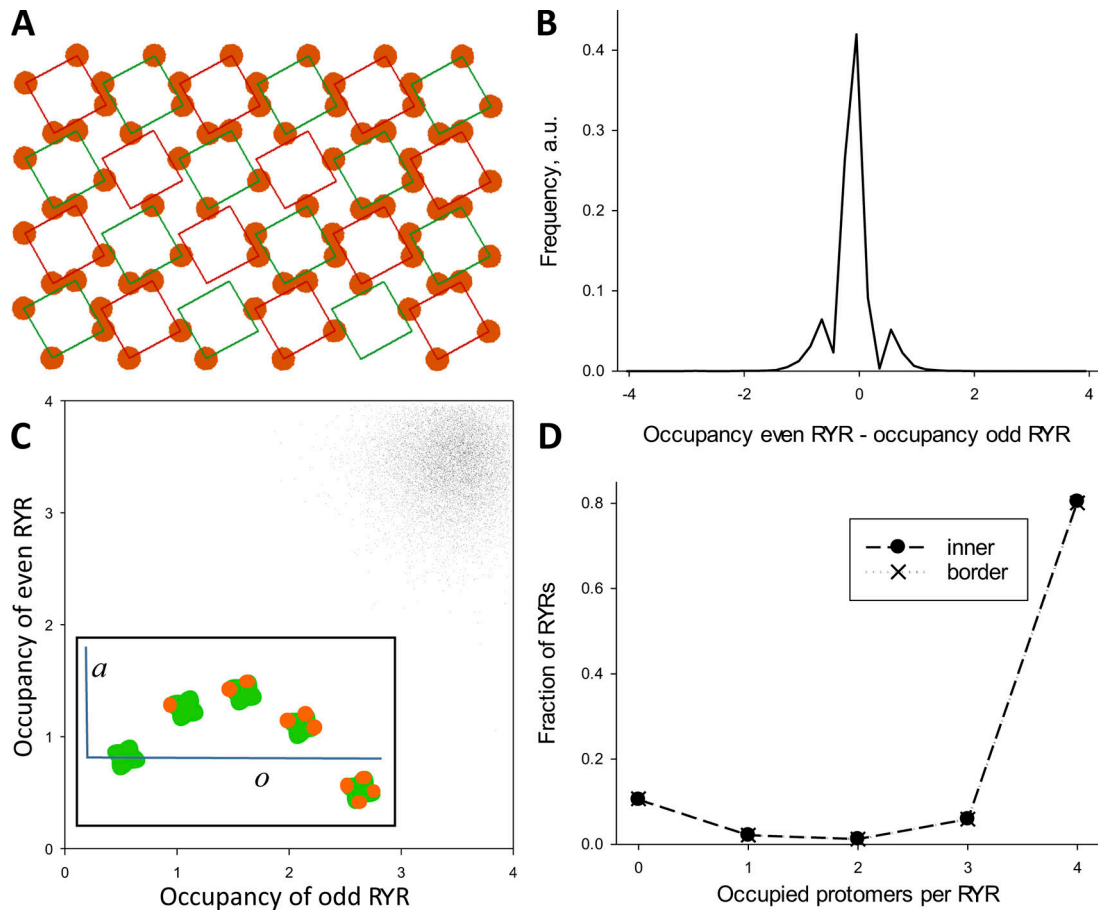

Figure S1. **Simulation outcomes for a model that removes the assumption of steric hindrance (parameter  $S = 0$ ).** Parameter set  $A_3$  in Table S1. **(A)** Configuration of a couplon of four rows and six columns, representative of configurations favored under this condition. Same as in Fig. 2; green and red squares represent even and odd channels, respectively (RZR tetramers). Note many adjacent protomers simultaneously occupied. **(B)** Distributions of bias and difference between couplon occupancy of even and odd channels (definitions in Eq. 8). The average asymmetry calculated from this distribution is 0 (Eq. 9; numerical outcomes listed in Table S1). The absence of a steric effect eliminates bias and asymmetry. **(C)** Couplon occupancies ( $c_{oe}$  versus  $c_{oo}$ ) in a sample of  $2 \times 10^7$  configurations. The inset shows individual protomer configurations with green and red circles representing inner and border feet, respectively. A horizontal line separates the 'a' (above) and 'o' (below) regions. **(D)** Fractional occupancies  $f(o)$  for both sets of parameters. Crosses plot fractional occupancies of border feet (i.e., rows 0 and 3 and columns 0 and 5); circles represent fractional occupancies of inner feet. The absence of a steric effect trivially abolishes the differences between inner and border feet.

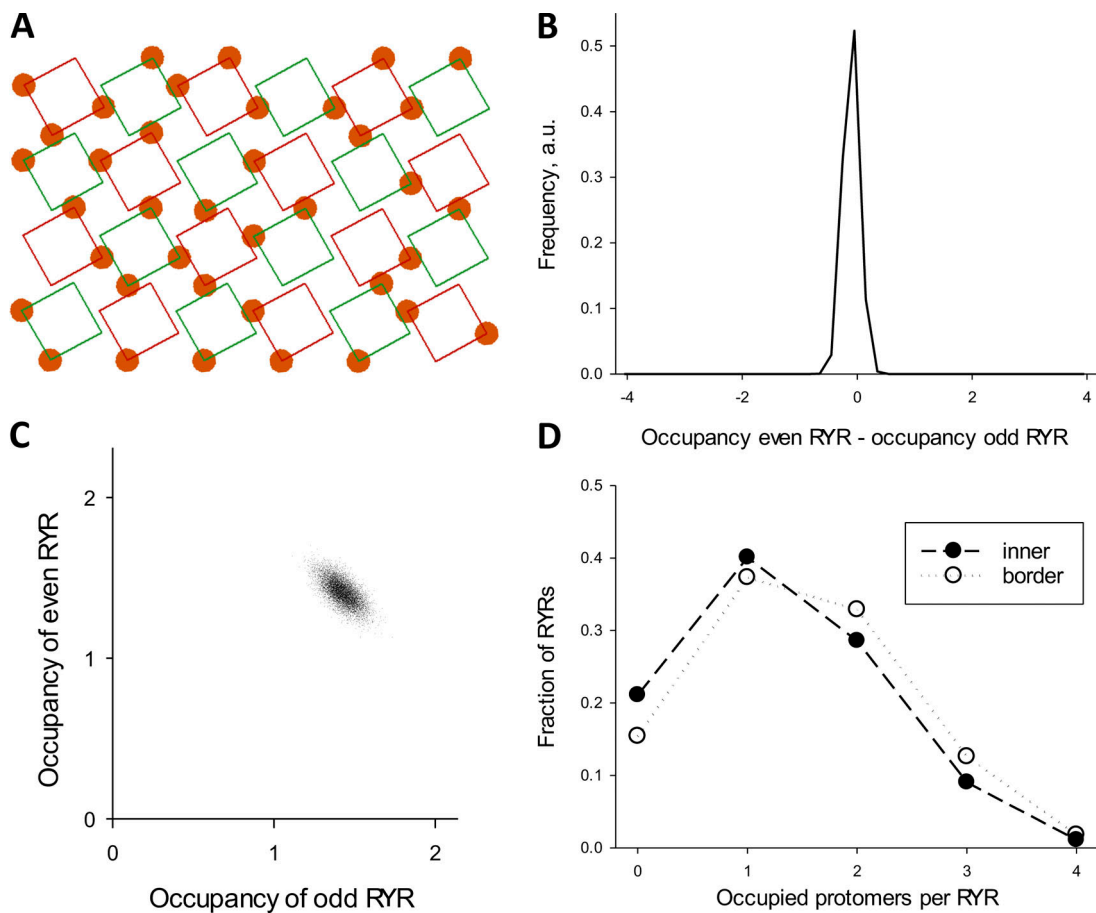

Figure S2. **Outcomes for a model that removes the allosteric effects (the elements in vector  $A$ —the energies of a tetramer at increasing levels of occupancy—are spaced by an equal difference  $\Delta E$ , the binding energy for all protomers, regardless of occupancy).** Energies listed as vector  $A_b$  in Table S1. The  $\Delta E$  are small and positive, corresponding to a midrange affinity. **(A)** Representative configuration of a  $4 \times 6$  couplon. Green and red squares represent even and odd channels, respectively. **(B)** Distribution of bias. The average asymmetry calculated from this distribution is close to 0 (Table S1). **(C)** Occupancies ( $co_e$  versus  $co_o$ ) in a sample of  $2 \times 10^7$  configurations. Occupancies stay similar for even and odd channels at values that depend on the chosen  $\Delta E$ . **(D)** Fractional occupancies  $f(o)$  for both sets of parameters. Open circles plot fractional occupancies of border feet; filled circles represent fractional occupancies of inner feet. In the present case, with  $\Delta E$  small and positive, the most favored values of occupancy  $co$  remains below 2. The outcomes of all simulations are listed in Table S1.

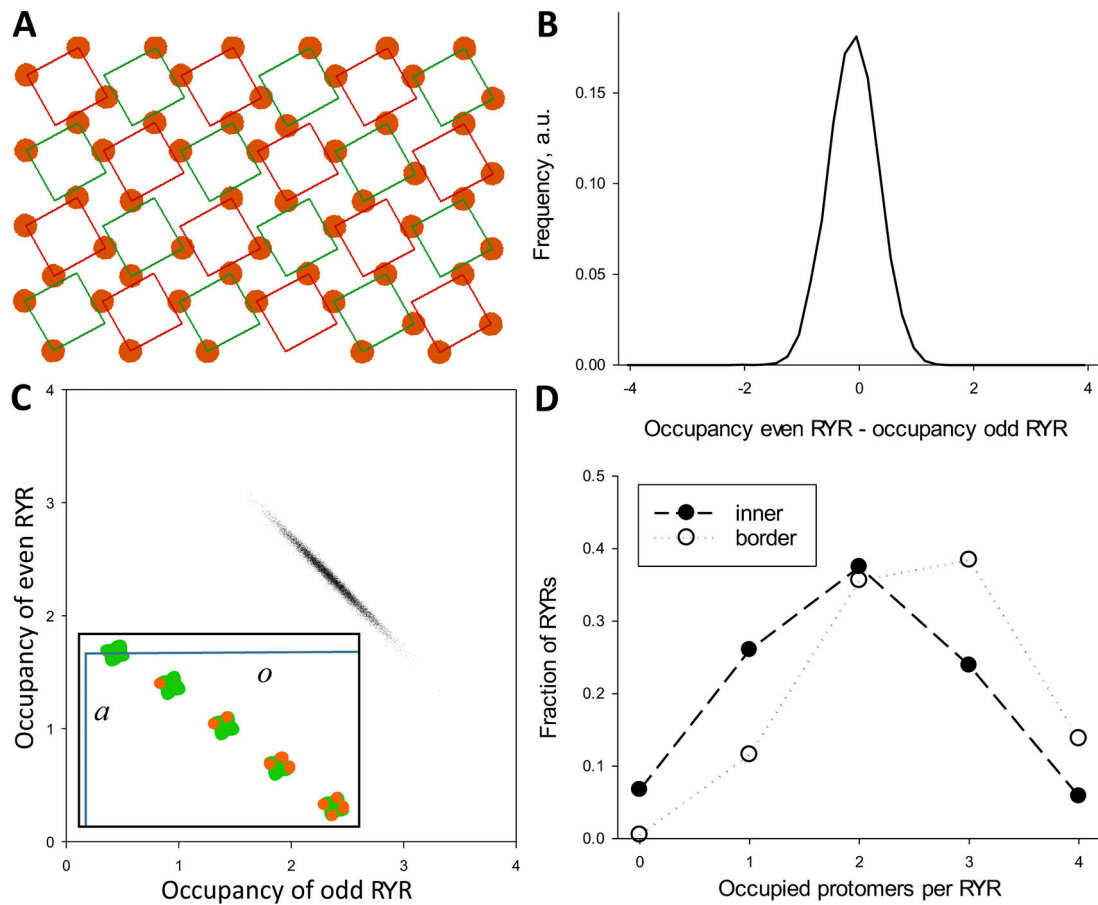

Figure S3. **Outcomes for a model that removes allosteric effects, with equal high binding affinity at all levels of occupancy.** The energies of a tetramer at increasing levels of occupancy (vector  $A_c$  in Table S1) are spaced by an equal large negative difference  $\Delta E$ , which determines a large binding affinity for all protomers, regardless of occupancy. **(A)** Representative configuration of a 4 × 6 couplon. **(B)** Distribution of bias. The average asymmetry calculated from this distribution is close to 0 (Table S1). **(C)**  $co_e$  versus  $co_o$  in a sample of  $2 \times 10^7$  configurations. Occupancies are similar for even and odd channels. **(D)** Fractional occupancies  $f(o)$  for both sets of parameters. Open and filled circles plot fractional occupancies of border and inner RYR tetramers, respectively. In the present case, with  $\Delta E$  large and negative, the most favored values of occupancy  $co$  increase with regard to the previous example (Fig. S2), and the increase is especially marked in border RYR tetramers, where the steric repulsion is lower.

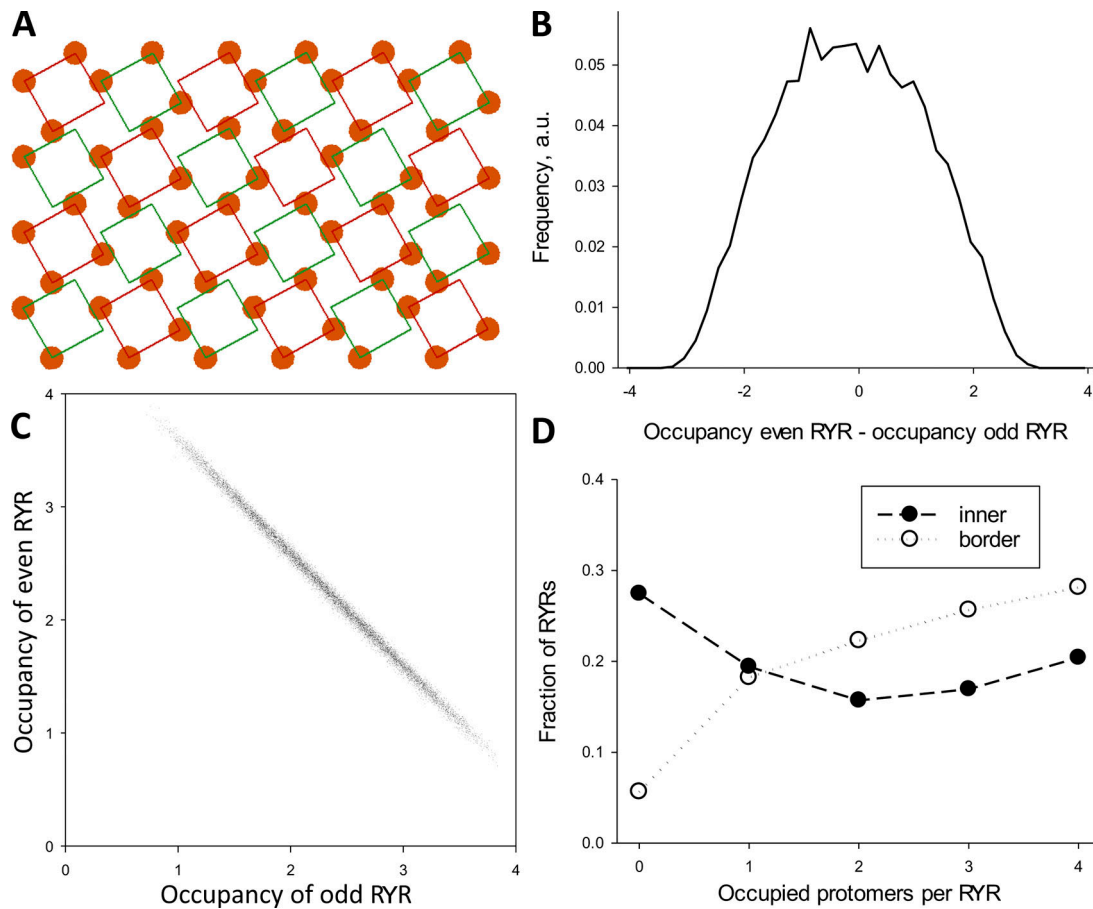

Figure S4. **Outcomes for a model that includes allosteric effects, with equal increases of binding affinity at successive levels of occupancy.** The energies of a tetramer at increasing levels of occupancy (vector  $A_d$  in Table S1) are spaced by an increasing negative  $\Delta E$ , which determines equal increases in binding affinity as successive protomers become occupied, an equal allosteric effect at every level of occupancy. **(A)** Representative configuration of a  $4 \times 6$  couplon. **(B)** Distribution of bias, which is much wider than in the other cases illustrated in Online supplemental material, reaching an average asymmetry of 1.15 (Table S1). **(C)**  $co_e$  versus  $co_o$  in  $2 \times 10^7$  configurations. Occupancies of even and odd channels vary widely but lack the preference for high asymmetry (or bistability) exhibited by the simulations in Fig. 2. **(D)** Fractional occupancies  $f(o)$ . In the present case, the higher levels of occupancy are more frequent, although the tendency is opposed by the steric effect, which hinders occupancy at inner feet. This effect is especially marked in this four-row couplon, in which high occupancy ( $o = 3$  or  $4$ ) of border feet will severely hinder occupancy of the two rows of inner feet. Given this choice of allosteric parameters, the steric effect imposes an asymmetry between inner and outer feet, rather than the canonical asymmetry between even and odd feet.

Table S1. **Parameters of four versions of the model**

|                                | Occupancy |     |     |     |     | S |
|--------------------------------|-----------|-----|-----|-----|-----|---|
|                                | 0         | 1   | 2   | 3   | 4   |   |
| <b>Energy per RYR tetramer</b> |           |     |     |     |     |   |
| $A_a$                          | 0         | 3   | 4   | 2   | -2  | 0 |
| $A_b$                          | 0         | 0.1 | 0.2 | 0.3 | 0.4 | 8 |
| $A_c$                          | 0         | -3  | -6  | -9  | -12 | 8 |
| $A_d$                          | 0         | -1  | -3  | -6  | -10 | 8 |

The different rows lists vectors (A) of the values  $a_o$  of energies of the RYR tetramer at its five values of occupancy. The last column list the value S of the energy penalty incurred by steric clash.  $A_a$  is the set listed as high in Table 1 combined with the assumption of no steric hindrance (illustrated in Fig. S1).  $A_b$  is a case with no allosteric interactions and low site affinity (Fig. S2).  $A_c$  is a case with no allosteric interactions and high site affinity (Fig. S3). For  $A_d$ , allosteric effect is present at all levels of occupancy (the negative  $\Delta E$ , which sets binding affinity, increases by the same amount, 1 unit, at each successive level of occupancy; Fig. S4).

Table S2. **Outcomes of simulations with parameters listed in Table S1**

|                               | <b>Allosteric energies (A)</b> |                      |                      |                      |
|-------------------------------|--------------------------------|----------------------|----------------------|----------------------|
|                               | <b>A<sub>a</sub></b>           | <b>A<sub>b</sub></b> | <b>A<sub>c</sub></b> | <b>A<sub>d</sub></b> |
| Average occupancy             | 3.43                           | 1.15                 | 2.34                 | 2.29                 |
| Average occupancy inner feet  | 3.44                           | 1.29                 | 1.96                 | 1.83                 |
| Average occupancy border feet | 3.42                           | 1.48                 | 2.53                 | 2.52                 |
| Full occupancy                | 0.8                            | 0.02                 | 0.12                 | 0.25                 |
| Average asymmetry             | 0.46                           | 0.14                 | 0.44                 | 1.12                 |

Average occupancy is  $\langle co \rangle$  (Eq. 7) averaged over the configurations reached in  $2 \times 10^7$  transitions. Full occupancy is the variable  $f(4)$ . Average asymmetry is the average over the same  $2 \times 10^7$  configurations of the variable  $y$  (Eq. 9). Cases A<sub>a</sub> to A<sub>c</sub> illustrate that removing either the steric or the allosteric interactions crucially reduces asymmetry of occupancy of (even and odd) RYR channels. The outcomes with A<sub>d</sub>, which implements a strong allosteric effect at all occupancy levels, include a greater asymmetry but no particular preference for the extremes of occupancy (0 and 4) generated with the preferred sets. Illustrations and additional details are given in Figs. S1, S2, S3, and S4.
